# Supplementary material for: Açaí (Euterpe oleracea Mart.) Seed Extracts from Different Varieties: A Source of Proanthocyanidins and Eco-Friendly Corrosion Inhibition Activity
Source: MDPI journal article supplement (doi:10.3390/molecules26113433), 2021-06-05
Supplement: s1 [file s1]

# Açaí (*Euterpe oleracea* Mart.) Seed Extracts from Different Varieties: A Source of Proanthocyanidins and Eco-Friendly Corrosion Inhibition Activity

Gabriel Rocha Martins <sup>1</sup>, Douglas Guedes <sup>2</sup>, Urbano Luiz Marques de Paula <sup>1</sup>, Maria do Socorro Padilha de Oliveira <sup>3</sup>, Marcia Teresa Soares Lutterbach <sup>4</sup>, Leila Yone Reznik <sup>2</sup>, Eliana Flávia Camporese Sérvulo <sup>2</sup>, Celuta Sales Alviano <sup>5</sup>, Antonio Jorge Ribeiro da Silva <sup>1</sup> and Daniela Sales Alviano <sup>5,\*</sup>

<sup>1</sup> Instituto de Pesquisas de Produtos Naturais, Bloco H, Centro de Ciências da Saúde, Universidade Federal do Rio de Janeiro. Av. Carlos Chagas Filho, 373, Cidade Universitária, Rio de Janeiro, 21941-902, Brazil; gabrielmartins@gmail.com (G.R.M.); urbanomarques@outlook.com (U.L.M.d.P.); ajorge@ippn.ufrj.br (A.J.R.d.S.)

<sup>2</sup> Escola de Química, Bloco E, Centro de Tecnologia, Universidade Federal do Rio de Janeiro. Av. Athos da Silveira Ramos, 149, Cidade Universitária, Rio de Janeiro 21941-909, Brazil; douglas.guedes.ferreira@gmail.com (D.G.); lreznik@eq.ufrj.br (L.Y.R.); eliana@eq.ufrj.br (E.F.C.S.);

<sup>3</sup> Embrapa Amazônia Oriental–Trav. Dr. Enéas Pinheiro, s/n.–Belém, Pará, 66095-100, Brazil; socorro-padilha.oliveira@embrapa.br

<sup>4</sup> Instituto Nacional de Tecnologia, Divisão de Degradação e Corrosão. Av. Venezuela, 82, Rio de Janeiro, 20081-312, Brazil; marcia.lutterbach@int.gov.br

<sup>5</sup> Instituto de Microbiologia Paulo de Góes, Bloco I, Centro de Ciências da Saúde, Universidade Federal do Rio de Janeiro. Av. Carlos Chagas Filho, 373, Cidade Universitária, Rio de Janeiro, 21941-902, Brazil; alviano@micro.ufrj.br

\* Correspondence: [danielviano@micro.ufrj.br](mailto:danielviano@micro.ufrj.br); Tel.: +5521-3938-6711

## SUPPLEMENTARY MATERIAL

**Figure S1** – HILIC-HPLC-FLD chromatograms of PA, WA and BRS crude extracts. Peaks are identified by their degree of polymerization (DP).

**Figure S2** – HPLC-DAD chromatogram of PA extract. Extracted ion chromatograms corresponding to B-type procyanidins oligomers (monomer, dimer, trimer, tetramer, pentamer, hexamer, heptamer and octamer, respectively).

**Figure S3** – HPLC-DAD chromatogram of WA extract. Extracted ion chromatograms corresponding to B-type procyanidins oligomers (monomer, dimer, trimer, tetramer, pentamer, hexamer, heptamer and octamer, respectively).

**Figure S4** – HPLC-DAD chromatogram of BRS extract. Extracted ion chromatograms corresponding to B-type procyanidins oligomers (monomer, dimer, trimer, tetramer, pentamer, hexamer, heptamer and octamer, respectively).

**Figure S5** – Chromatograms of PA, WA and BRS phloroglucinolysis aqueous fractions.

**Figure S6** – MALDI-TOF  $[M+Na]^+$  mass spectra from PA, WA and BRS aqueous fractions.

**Figure S7** – Effect of PA on the metallic surface after 24 hours immersion in neutral pH corrosive solution without PA and 1.0 g.L<sup>-1</sup> of PA. A – Metallic surface after 24 hours immersion in neutral pH corrosive solution; B – Black protective film formation after 24 hours immersion in neutral pH corrosive solution with 1.0 g.L<sup>-1</sup> of PA; and C – metallic surface after black film removal.

**Figure S8** – Nyquist plot for carbon steel AISI 1020 in a neutral pH corrosive solution for purple açaí (PA) crude extract in 1.0 g.L<sup>-1</sup>. The control represents the absence of any inhibitor.

**Figure S9** – Bode plot for carbon steel AISI 1020 in a neutral pH corrosive solution purple açaí (PA) crude extract in 1.0 g.L<sup>-1</sup>. The control represents the absence of any inhibitor. Relation between log frequency (Hz) and phase angle (°) and log impedance modules ( $\Omega \cdot \text{cm}^{-2}$ ).

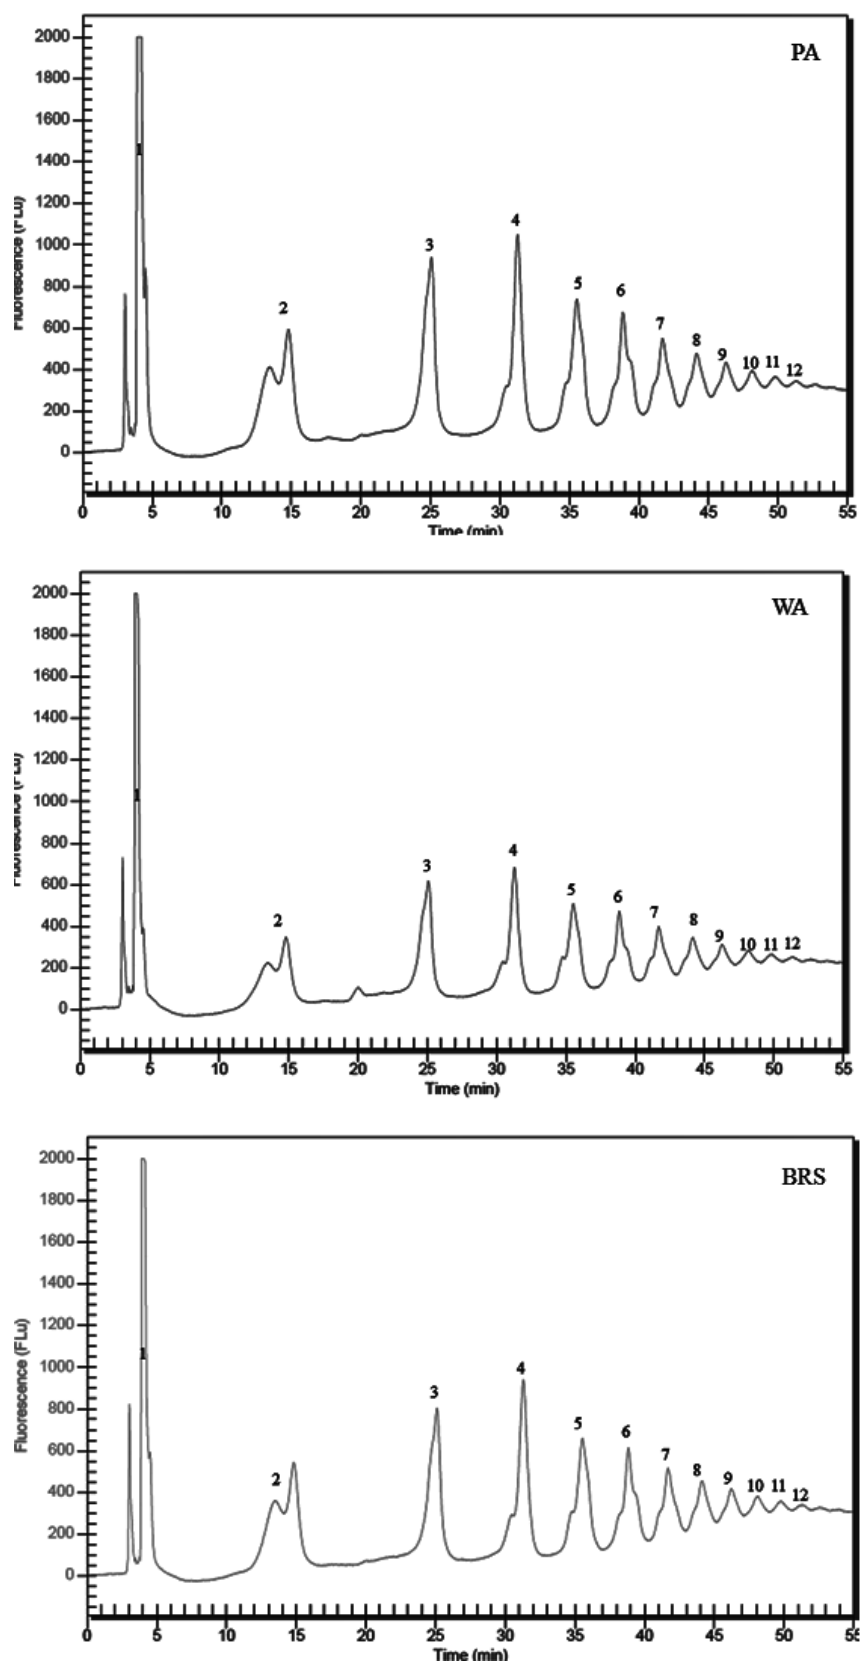

**Figure S1** – HILIC-HPLC-FLD chromatograms of PA, WA and BRS crude extracts. Peaks are identified by their degree of polymerization (DP).

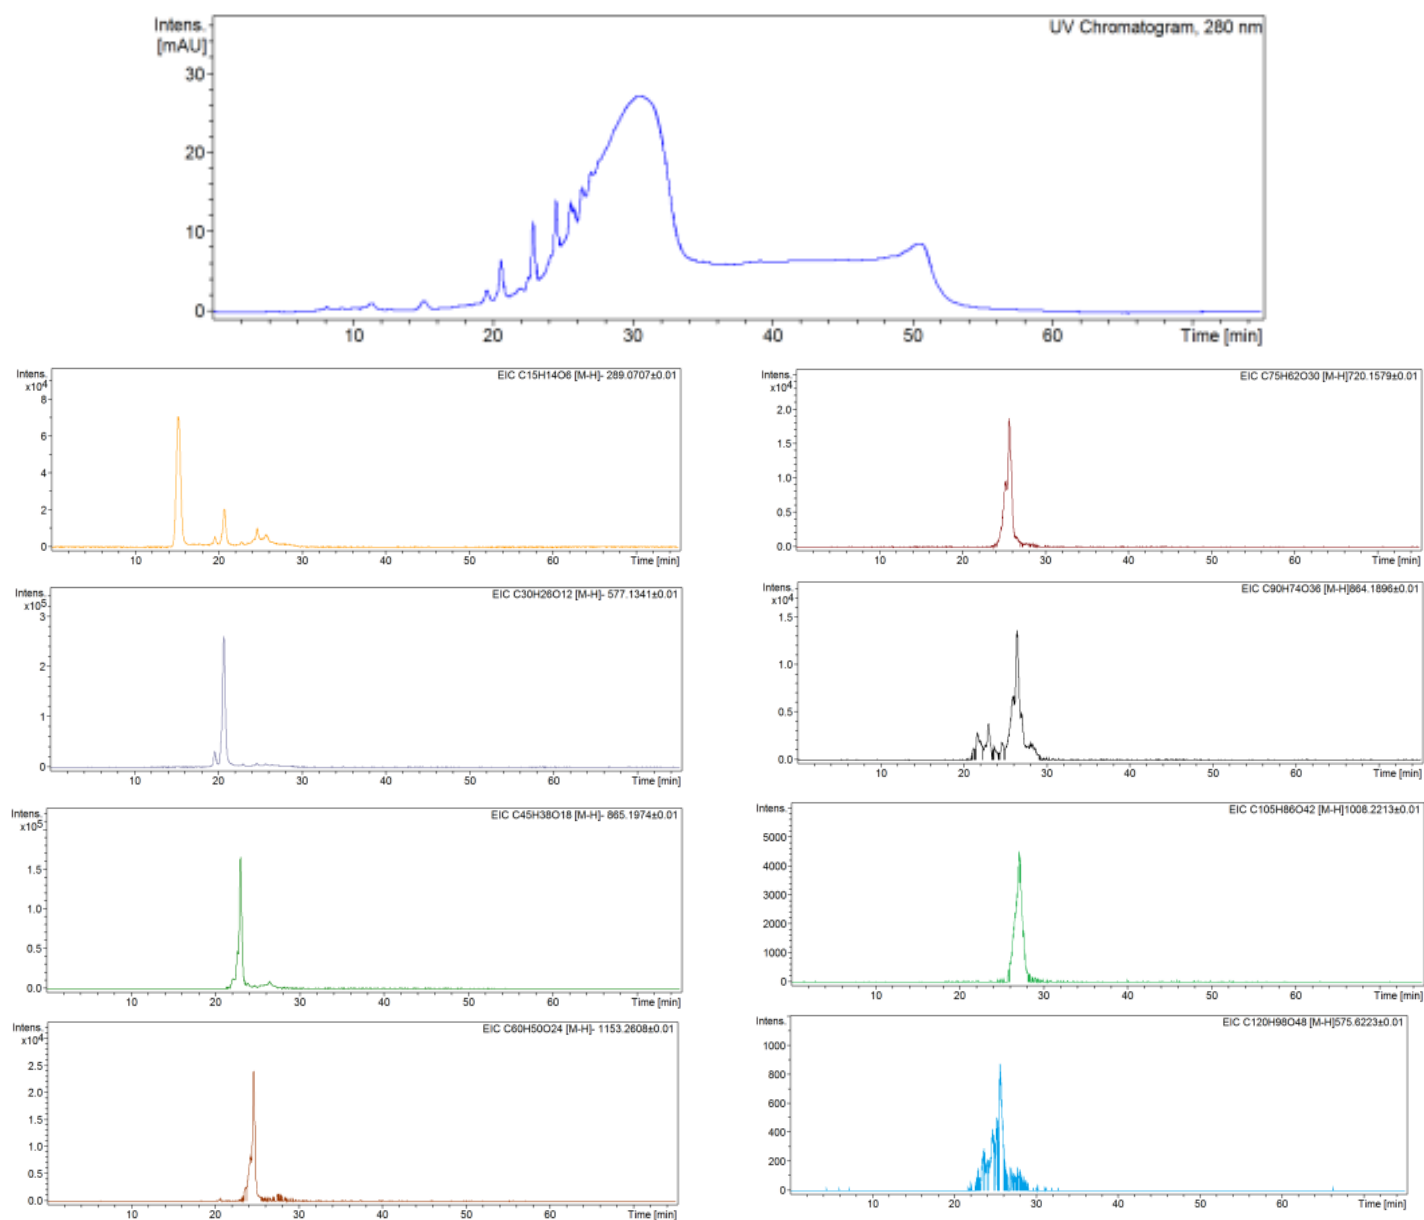

**Figure S2** – HPLC-DAD chromatogram of PA extract. Extracted ion chromatograms corresponding to B-type procyanidins oligomers (monomer, dimer, trimer, tetramer, pentamer, hexamer, heptamer and octamer, respectively).

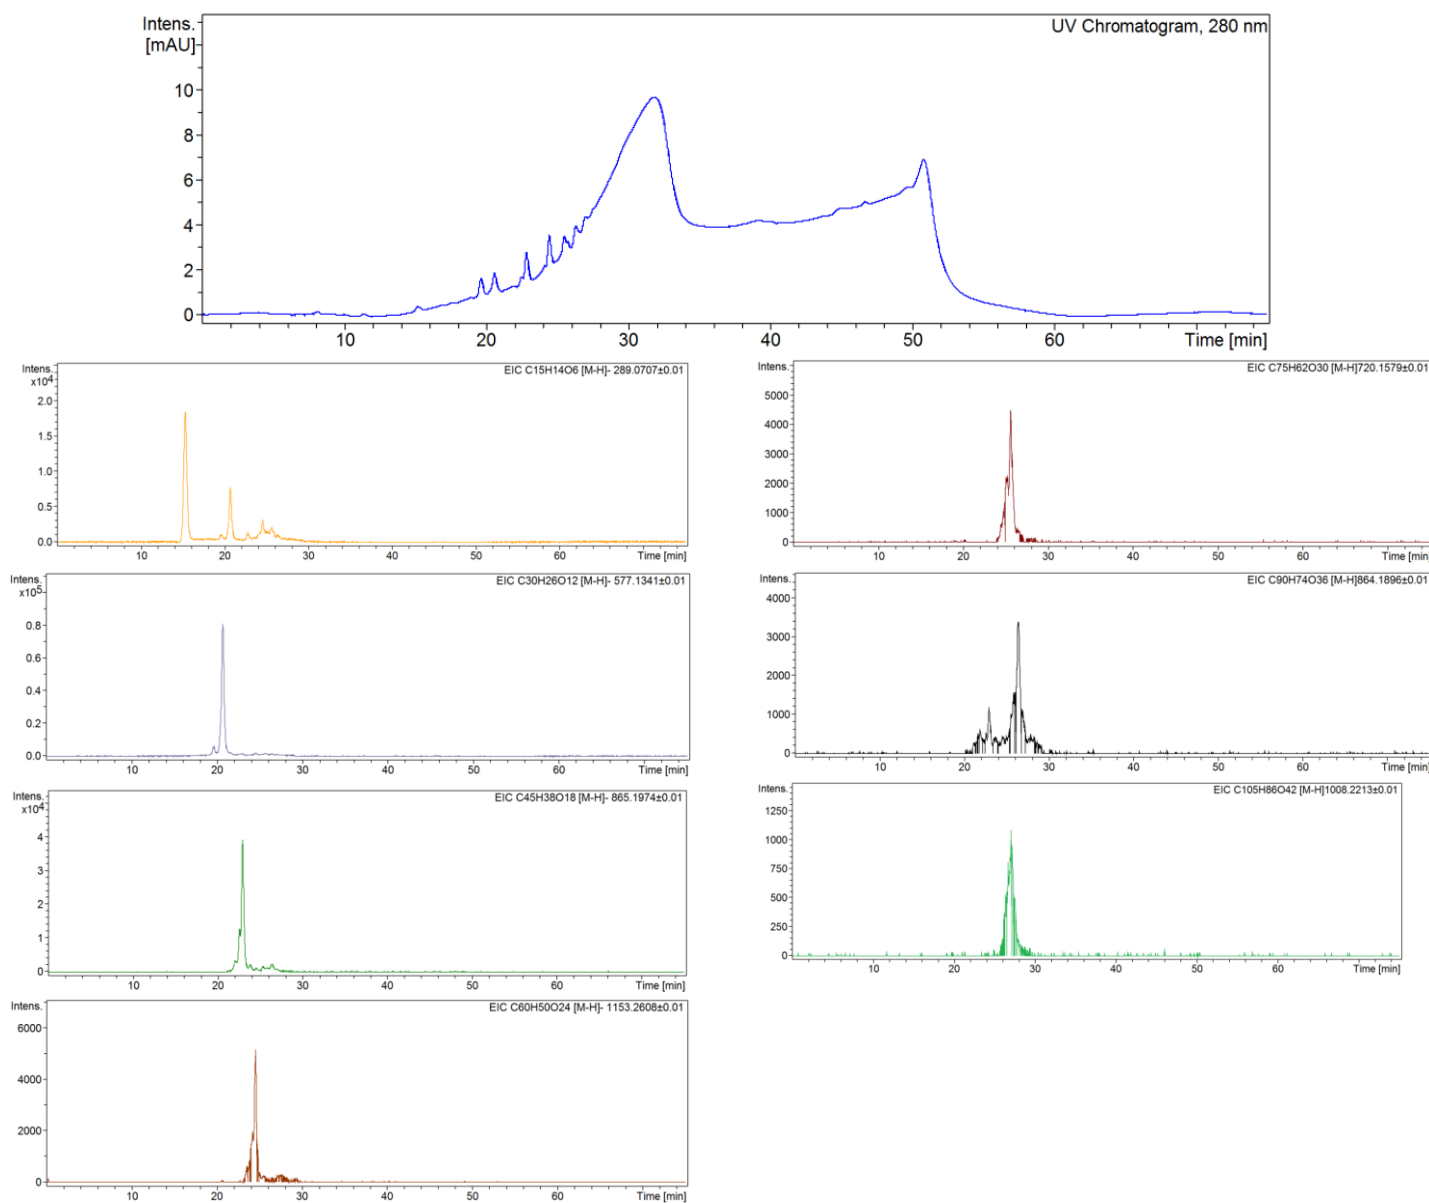

**Figure S3** – HPLC-DAD chromatogram of WA extract. Extracted ion chromatograms corresponding to B-type procyanidins oligomers (monomer, dimer, trimer, tetramer, pentamer, hexamer, heptamer and octamer, respectively).

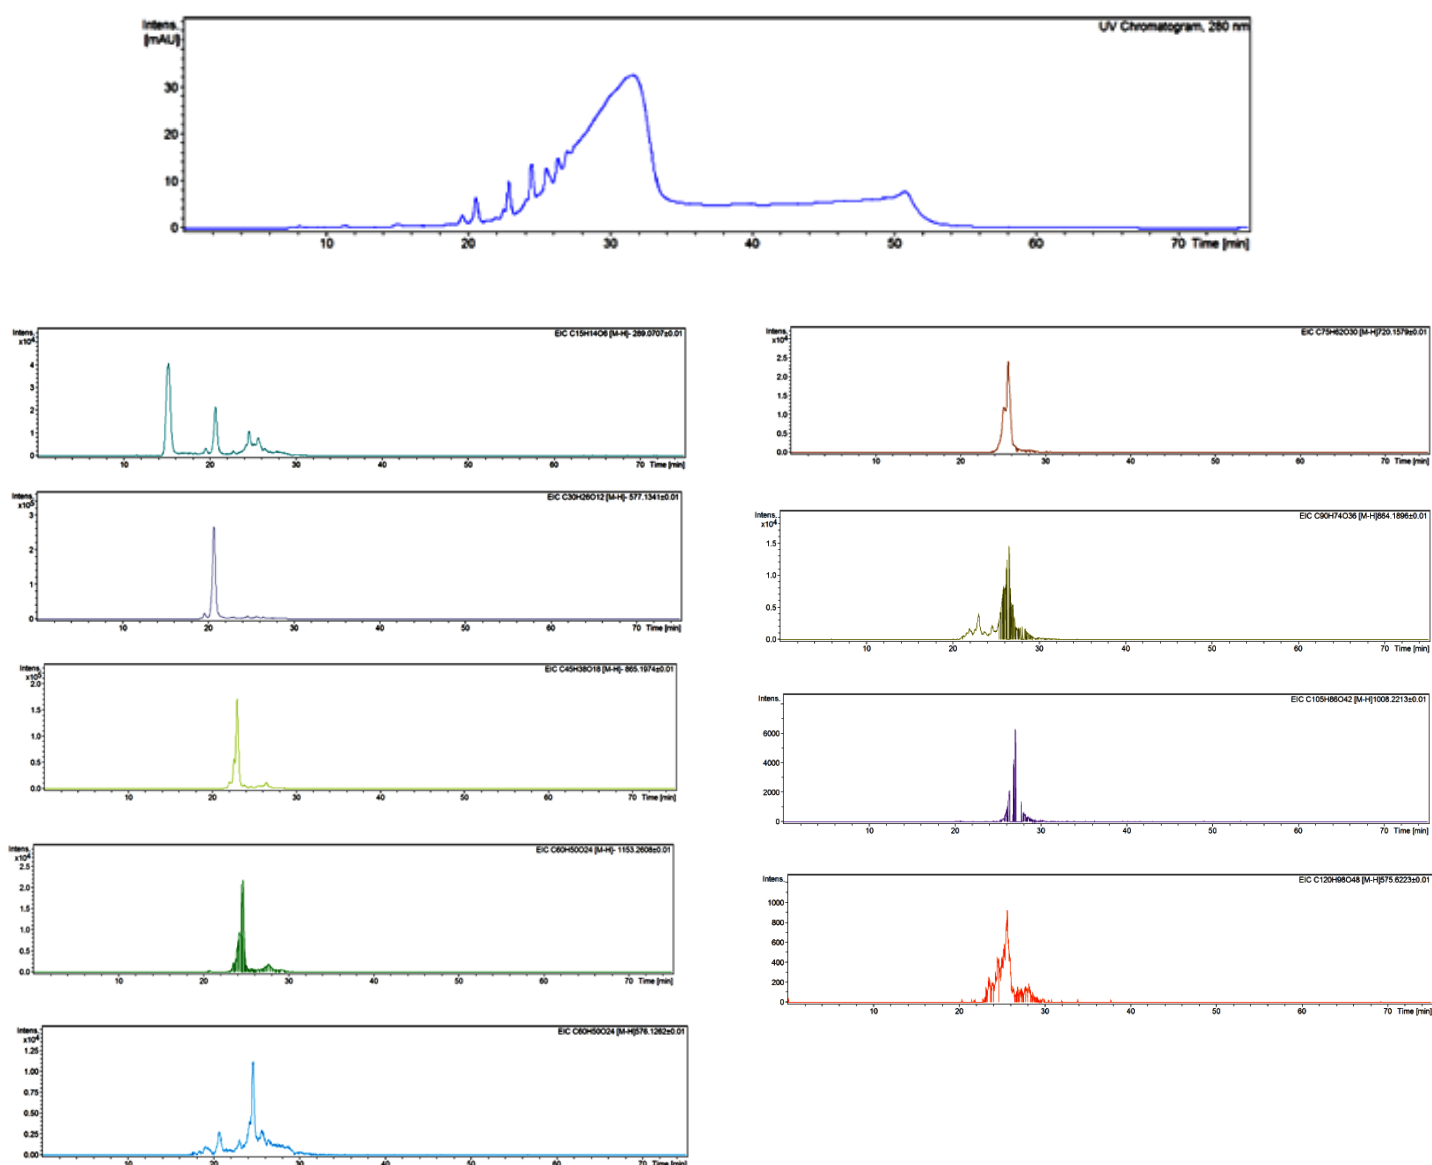

**Figure S4** – HPLC-DAD chromatogram of BRS extract. Extracted ion chromatograms corresponding to B-type procyanidins oligomers (monomer, dimer, trimer, tetramer, pentamer, hexamer, heptamer and octamer, respectively).

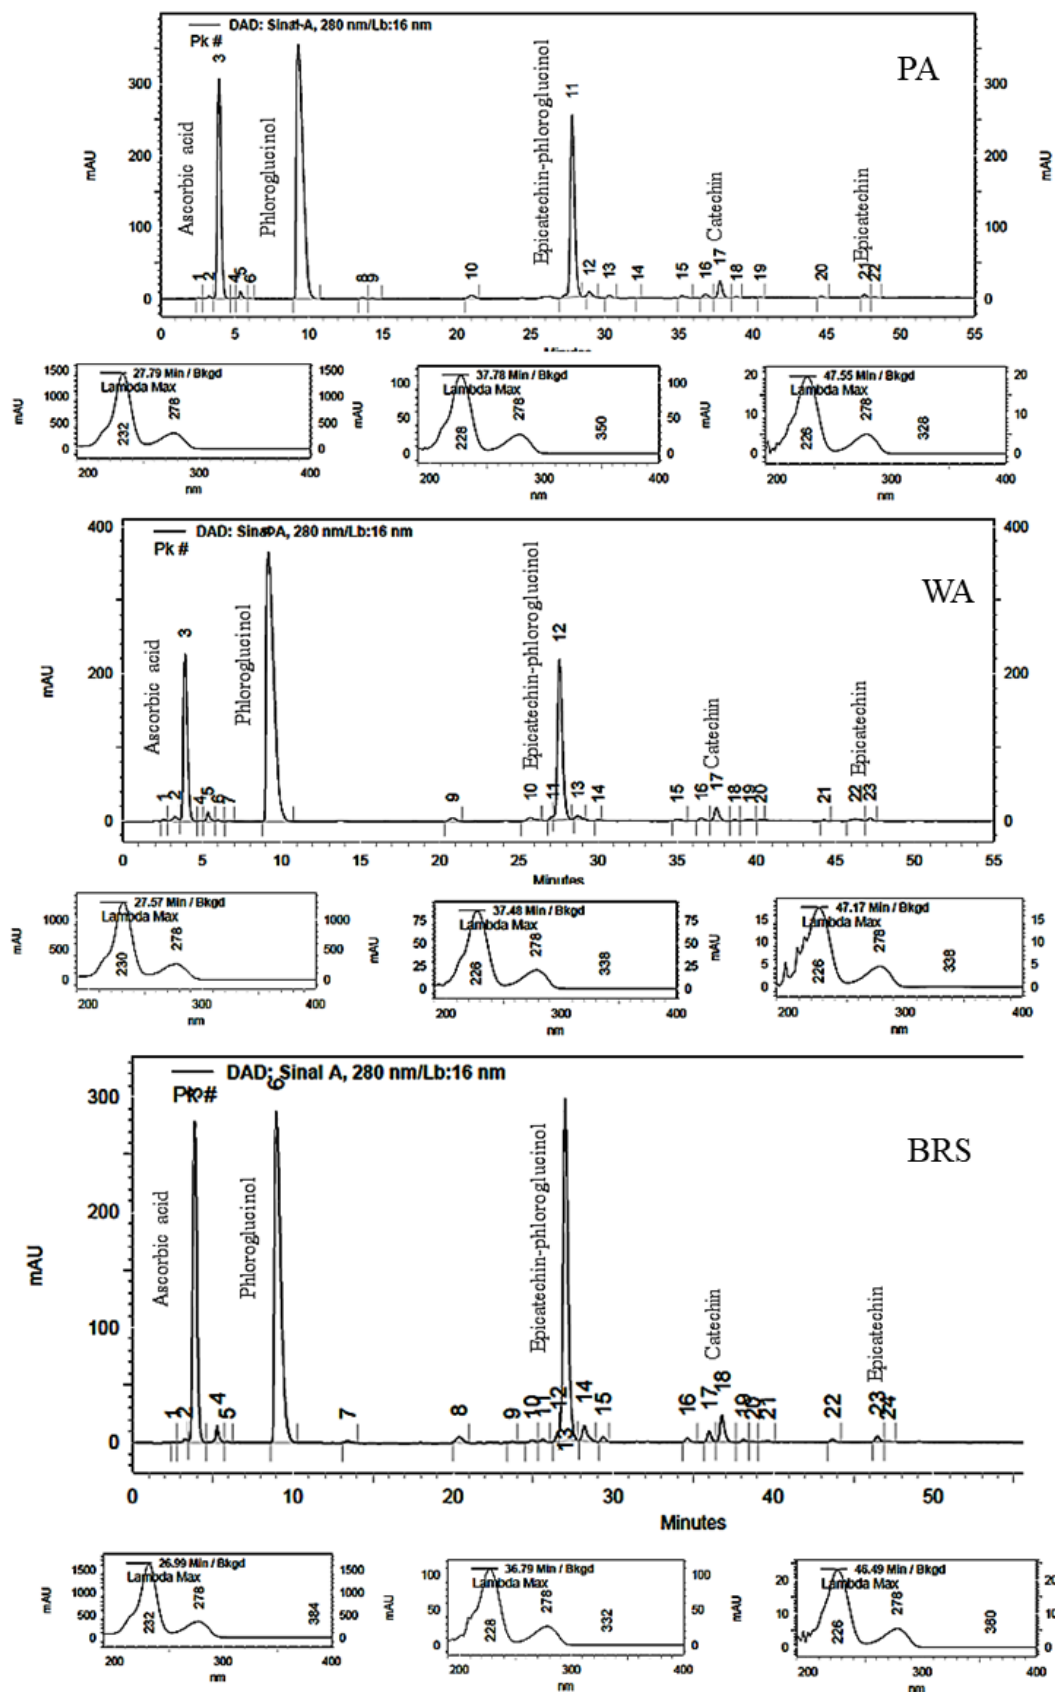

Figure S5 – Chromatograms of PA, WA and BRS phloroglucinolysis aqueous fractions.

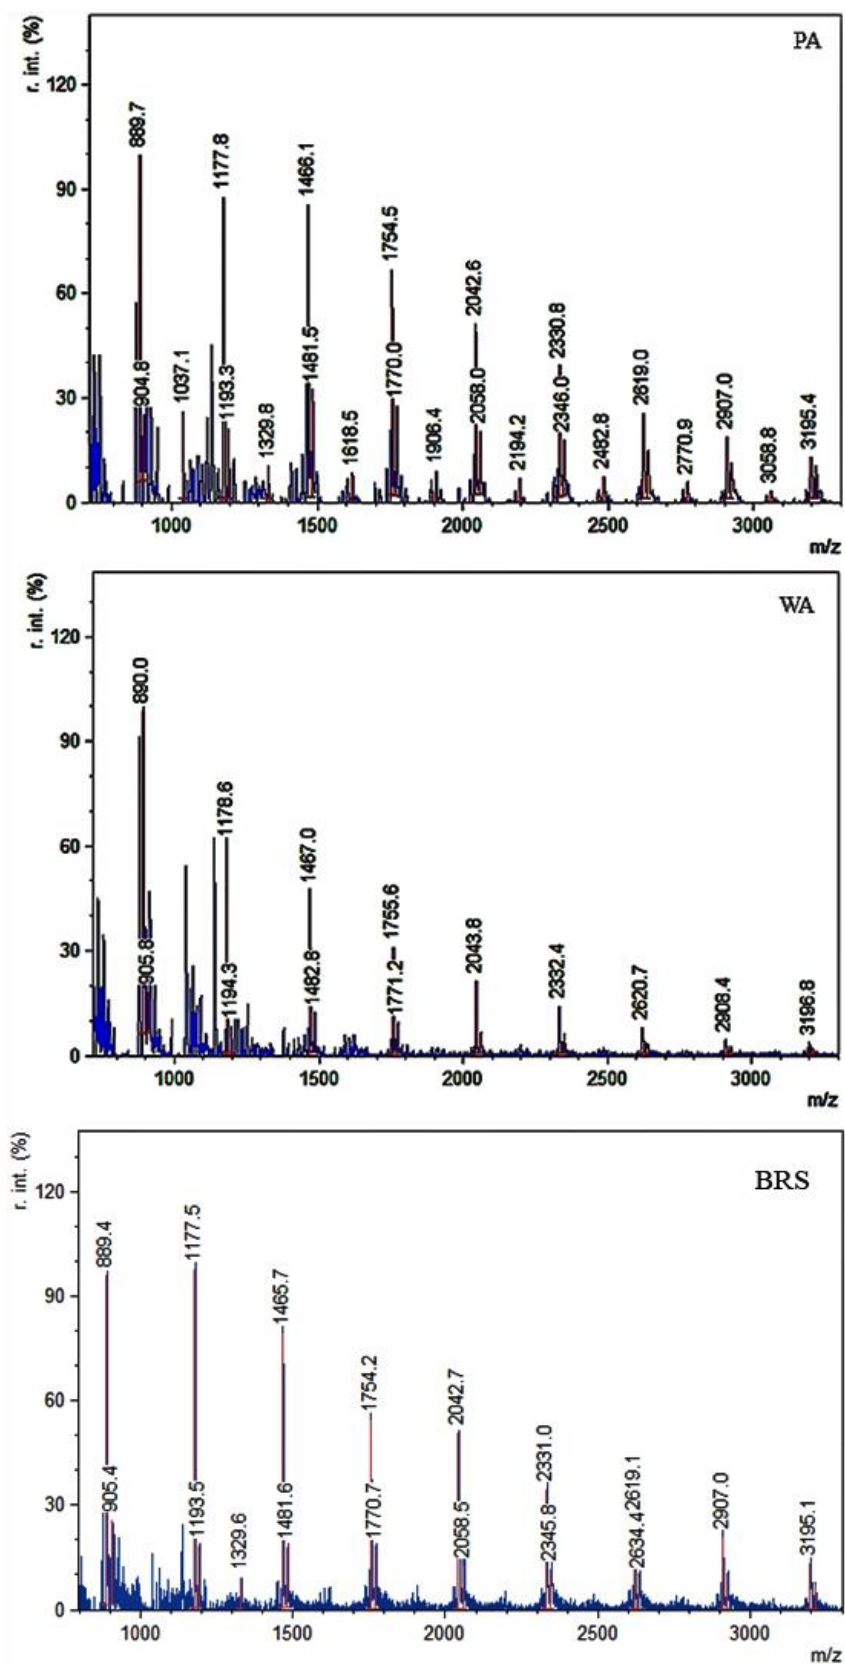

**Figure S6** – MALDI-TOF  $[M+Na]^+$  mass spectra from PA, WA and BRS aqueous fractions.

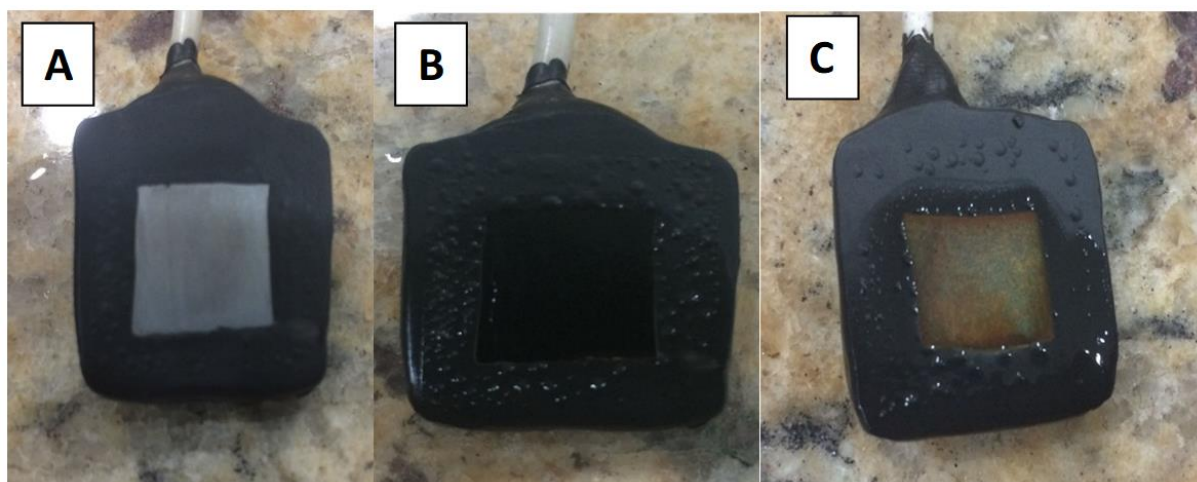

**Figure S7** – Effect of PA on the metallic surface after 24 hours immersion in neutral pH corrosive solution without PA and  $1.0 \text{ g.L}^{-1}$  of PA. A – Metallic surface after 24 hours immersion in neutral pH corrosive solution; B – Black protective film formation after 24 hours immersion in neutral pH corrosive solution with  $1.0 \text{ g.L}^{-1}$  of PA; and C – metallic surface after black film removal.



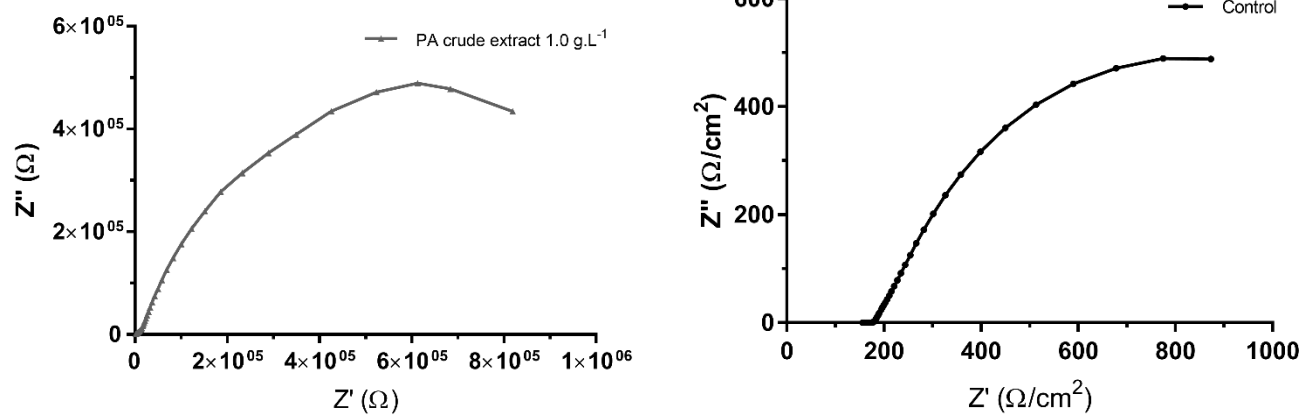

**Figure S8** – Nyquist plot for carbon steel AISI 1020 in a neutral pH corrosive solution for purple açai (PA) crude extract in 1.0 g.L<sup>-1</sup>. The control represents the absence of any inhibitor.

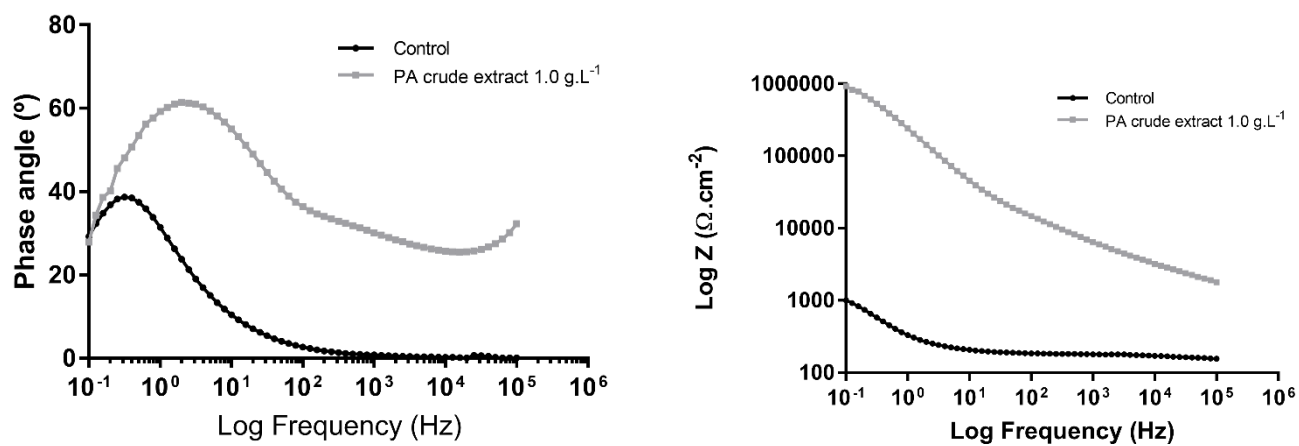

**Figure S9** – Bode plot for carbon steel AISI 1020 in a neutral pH corrosive solution purple açaí (PA) crude extract in  $1.0 \text{ g.L}^{-1}$ . The control represents the absence of any inhibitor. Relation between log frequency (Hz) and phase angle (°) and log impedance modules ( $\Omega \cdot \text{cm}^{-2}$ ).
